# Supplementary material for: Pegylated Liposomal Doxorubicin Versus Epirubicin as Adjuvant Therapy for Stage I–III Breast Cancer
Source: Front Genet. 2021 Sep 20;12:746114. doi: 10.3389/fgene.2021.746114 (PMC8488192; doi:10.3389/fgene.2021.746114)
Supplement: Supplementary file 1 [file Table_1.XLSX]

## Sheet: Sheet1
			Stages			Molecular subtypes
			I	II	III	HER2-P	luminal	TRI-N	TRI-P
OS	3-year	PLD	0.981	0.982	0.905	1	0.985	0.967	1
		EPI	0.982	0.991	0.938	0.988	0.988	0.989	0.981
	5-year	PLD	0.962	0.932	0.905	0.958	0.97	0.884	0.952
		EPI	0.978	0.97	0.888	0.941	0.97	0.989	0.981
	10-year	PLD	0.962	0.932	0.905	0.958	0.97	0.884	0.952
		EPI	0.912	0.894	0.888	0.941	0.877	0.912	0.957
DFS	3-year	PLD	0.973	0.945	0.755	0.933	0.972	0.918	0.965
		EPI	0.971	0.946	0.846	0.955	0.949	0.974	0.945
	5-year	PLD	0.964	0.894	0.755	0.933	0.935	0.898	0.92
		EPI	0.948	0.909	0.812	0.955	0.918	0.925	0.903
	10-year	PLD	0.964	0.876	0.755	0.933	0.935	0.848	0.92
		EPI	0.899	0.859	0.812	0.955	0.841	0.911	0.883
Table S1 The 3-, 5- and 10-year OS and DFS of the two regimens for different stages and molecular subtypes. PLD: pegylated liposomal doxorubicin; EPI: epirubicin.
