# Supplementary material for: Pegylated Liposomal Doxorubicin Versus Epirubicin as Adjuvant Therapy for Stage I–III Breast Cancer
Source: Front Genet. 2021 Sep 20;12:746114. doi: 10.3389/fgene.2021.746114 (PMC8488192; doi:10.3389/fgene.2021.746114)
Supplement: Supplementary file 2 [file Table_2.XLSX]

## Sheet: Sheet1
Characteristic	PLD	EPI	P-value	Test
LVEF decrease	159 (5.46)	132 (6.71)	0.012	t-test
ECG normal	318	212		Chi-squared test
ECG abnormal	308	267	0.036
Table S2 Summarized LVEF and ECG data of patients. Data are presented with n (median) for LVEF decrease (after chemotherapy) and n for the rest. The abnormality of ECG includes non-sinus rhythm, abnormal Q wave, conduction block or ST segment change.
